# Supplementary material for: Vacuole Proteins with Optimized Microtubule Assembly Is Required for Fum1 Protein Localization and Fumonisin Biosynthesis in Mycotoxigenic Fungus Fusarium verticillioides
Source: MDPI journal article supplement (doi:10.3390/jof9020268), 2023-02-16
Supplement: s1 [file s1]

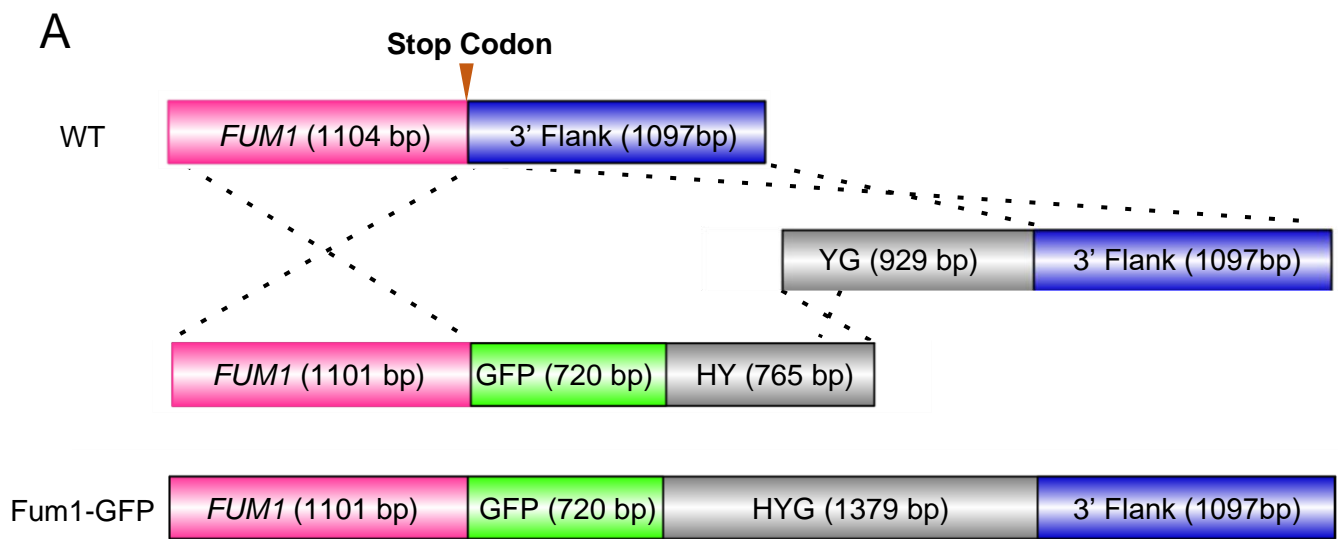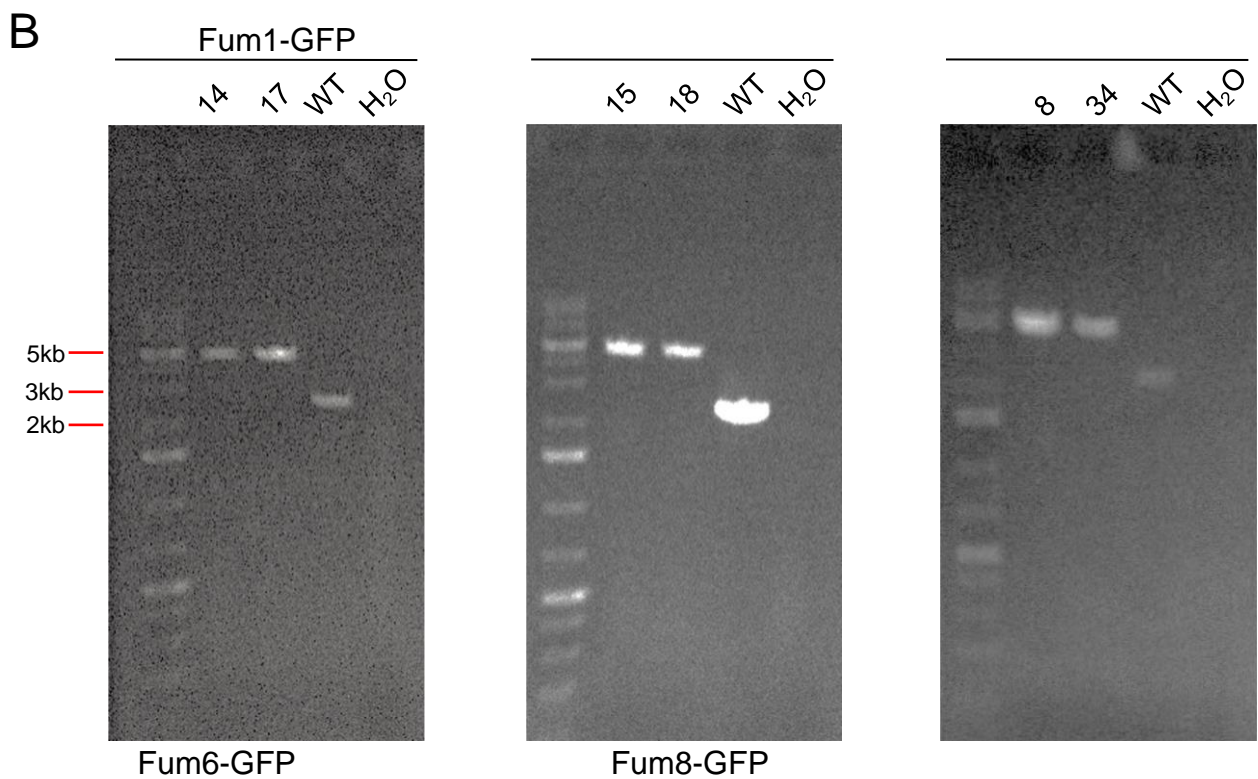

**Figure S1. Schematic description and confirmation of the split marker strategy to generate Fum1 GFP strain.** (A) Schematic of the GFP and split hygromycin B phosphotransferase gene (*HPH*) were to replace the *FvFUM1* gene stop codon. (B) PCR confirms the generation of two independent single insertion fluorescent strains. The PCR bands in the correct fluorescent strains are around 4.5kb compared to about 2.5kb in wild type strains.

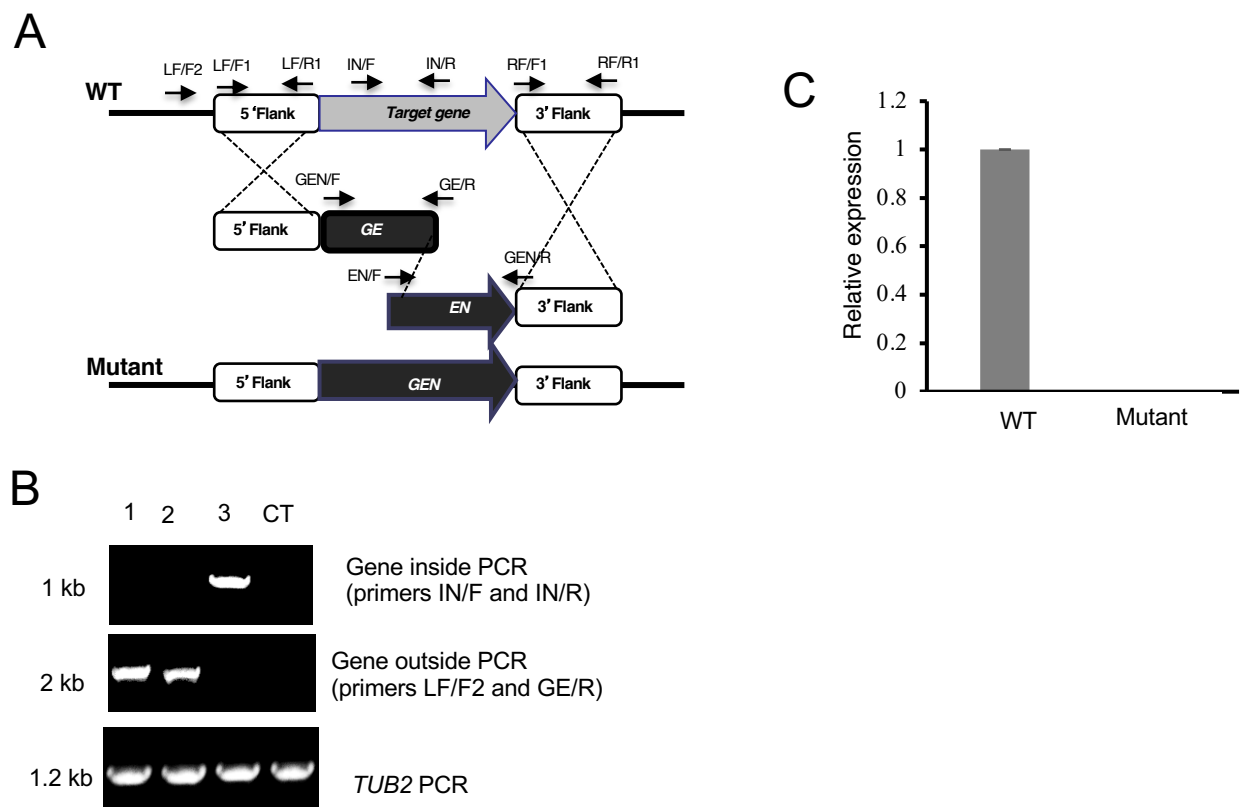

**Figure S2. Schematic representation of the gene deletion and mutant screening.** (A) Target replacement of targeted gene with the geneticin gene (*GEN*) by the split marker technique through homologous recombination. Arrows indicate primers used for PCR. *GE*, *GEN* 5' partial amplicon, *EN*, *GEN* 3' partial amplification. (B) PCR conformation of gene knockout mutants. Strains 1 and 2 are example of knockout mutants, and strain 3 is an example of a false positive. CT is negative control PCR with no DNA template. Beta-tubulin gene (*TUB2*) was PCR amplified as positive control. (C) One of the knockout mutants was further confirmed by qPCR. All primers used are listed in Table S1.

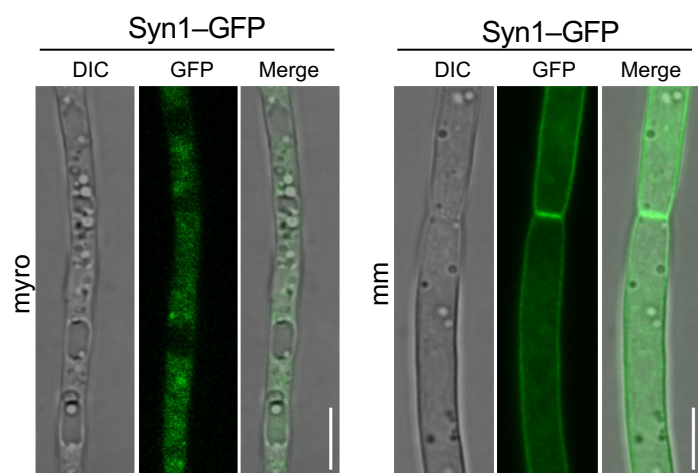

**Figure S3. Localization of Syn1-GFP in myro and MM broth.** Syn1-GFP subcellular images in myro and MM medium were used as a control. Bar = 5  $\mu$ m.

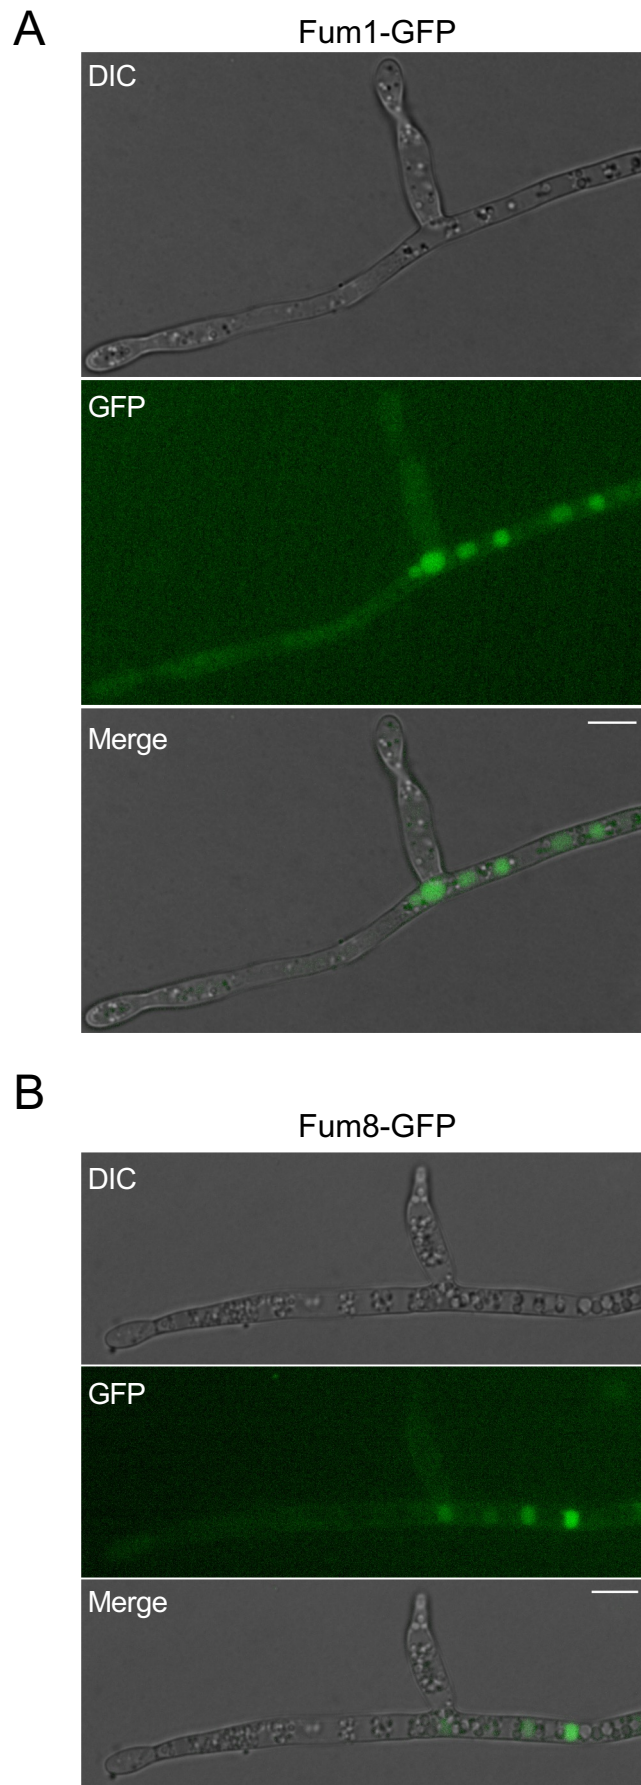

**Figure S4. Fum1-GFP and Fum8-GFP absent localization on growing apical area.** The Fum1-GFP (A) and Fum8-GFP (B) signals cannot be detected in apical and branching hyphae. Bar = 5  $\mu$ m.

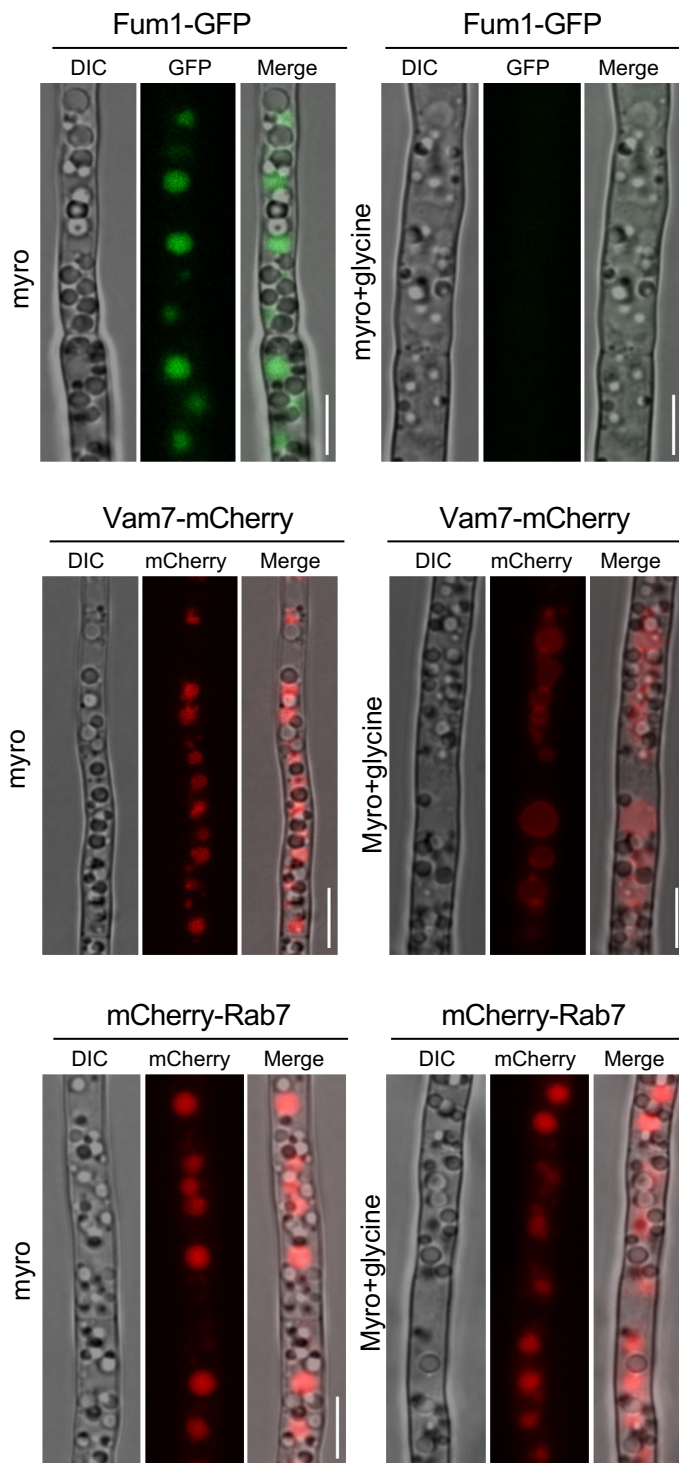

**Figure S5. Nitrogen repression of Fum1-GFP expression.** Fum1-GFP strain conidia were grown in myro liquid medium with constant shaking. After 48 h incubation, the culture was separated into two flasks without and with adding glycine to final concentration 10  $\mu$ M in myro liquid medium. Images were taken after 5 more hours of incubation. Vam7-mCherry and mCherry-Rab7 were as controls. Bar = 5  $\mu$ m.

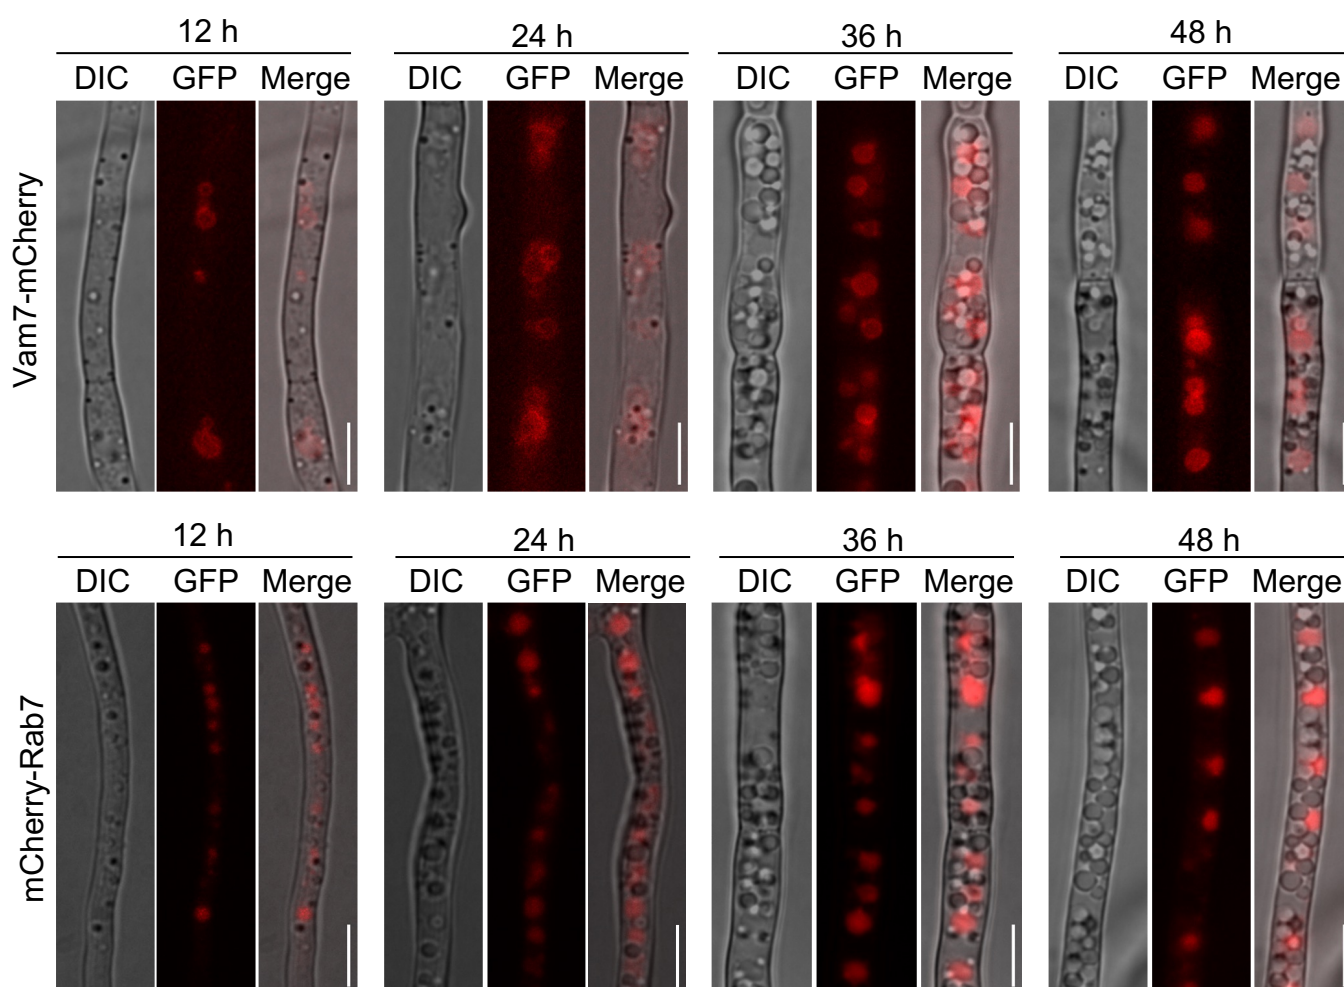

**Figure S6. Time courses of Vam7-mCherry and mCherry-Rab7.** Examination of Vam7-mCherry and mCherry-Rab7 at four different time points (12 h, 24 h, 36 h, 48 h) in myro liquid medium. Bar = 5  $\mu$ m.

**Table S1. Primers used in this study.**

| Primer   | Primer sequence (5'-3')                                                         | Application                                                  |
|----------|---------------------------------------------------------------------------------|--------------------------------------------------------------|
| FUM1-LF2 | TCC TAT CAC ACC AAA GCC TCT AC                                                  | validation of Fum1-GFP strain                                |
| FUM1-LF1 | GGT GCC CGA TAC CTA ATC TTC TTC                                                 | amplify <i>FUM1</i> 5' flank sequence                        |
| FUM1-LR1 | <u>GCT CCT CGC CCT TGC TCA CCA TTG</u> GGG CCT TCA TTT<br>CTA GAT ACG           | amplify <i>FUM1</i> 5' flank sequence (Fum1-GFP)             |
| FUM1-RF1 | <u>ATA GAG TAG ATG CCG ACC GGG AAC</u> ATA CCT ACC<br>TAG ACA CTG AGC TGG       | amplify <i>FvFUM1</i> 3' flank sequence ( <i>HPH</i> linker) |
| FUM1-RR1 | CTC CGG CCA CTC AAG GAA TAA A                                                   | amplify <i>FvFUM1</i> 3' flank sequence                      |
| FUM1-RR2 | GTC TCA CTG AGC CTG AGA GAT T                                                   | validation of Fum1-GFP strain                                |
| FUM6-LF2 | GCG ACC ACG TCT ATA TCC TGC                                                     | validation of Fum6-GFP strain                                |
| FUM6-LF1 | TTC CGT TAG ATA CGC CCA TCA C                                                   | amplify <i>FUM6</i> 5' flank sequence                        |
| FUM6-LR1 | <u>GCT CCT CGC CCT TGC TCA CCA TCA</u> CAT AAA CTT CTT<br>CCA CGT ATC TCG       | amplify <i>FUM6</i> 5' flank sequence (Fum6-GFP)             |
| FUM6-RF1 | <u>ATA GAG TAG ATG CCG ACC GGG AAC</u> GTT GGG CTC<br>TTC GGG TGC ATT           | amplify <i>FvFUM6</i> 3' flank sequence ( <i>HPH</i> linker) |
| FUM6-RR1 | ATT GGT CTA CGG AGC GAC AAA G                                                   | amplify <i>FvFUM6</i> 3' flank sequence                      |
| FUM6-RR2 | TCT AGC CAA GAA CCC AGA ACG                                                     | validation of Fum6-GFP strain                                |
| FUM8-LF2 | CGC TAC GCC ATT ATG GTA AGA AC                                                  | validation of Fum8-GFP strain                                |
| FUM8-LF1 | GCA TCA CCG CCA CTG TCT TTA C                                                   | amplify <i>FUM8</i> 5' flank sequence                        |
| FUM8-LR1 | <u>GCT CCT CGC CCT TGC TCA CCA TAC</u> ATG TCC CTC GCG<br>ATA AAA TCT           | amplify <i>FUM8</i> 5' flank sequence ( <i>HPH</i> linker)   |
| FUM8-RF1 | <u>ATA GAG TAG ATG CCG ACC GGG AAC</u> ATG TAA CTA<br>GGC AGA GTA GTA GTA TTG G | amplify <i>FvFUM8</i> 3' flank sequence (Fum8-GFP)           |
| FUM8-RR1 | TAA ATG TGC CCA CTA CAC TAT CCG                                                 | amplify <i>FvFUM8</i> 3' flank sequence                      |

|                      |                                                                             |                                                         |
|----------------------|-----------------------------------------------------------------------------|---------------------------------------------------------|
| FUM8-RR2             | TGC TGG CTG CAA ACA ATG TCA                                                 | validation of Fum8-GFP strain                           |
| GFP-F                | ATG GTG AGC AAG GGC GA                                                      | amplify GFP fragment                                    |
| GFP-R                | <u>TTG ACC TCC ACT AGC TCC AGC CAA GTT</u> ACT TGT ACA<br>GCT CGT CCA TGC C | amplify GFP fragment                                    |
| HYG/F                | TTG GCT GGA GCT AGT GGA GGT CAA                                             | amplify HY fragment                                     |
| HY/R                 | GTA TTG ACC GAT TCC TTG CGG TCC GAA                                         | amplify HY fragment                                     |
| HYG/R                | GTT CCC GGT CGG CAT CTA CTC TAT                                             | amplify YG fragment                                     |
| YG/F                 | GAT GTA GGA GGG CGT GGA TAT GTC CT                                          | amplify YG fragment                                     |
| FUM6_LR<br>(mcherry) | <u>CT CCT CGC CCT TGC TCA CCA T</u> CAC ATA AAC TTC TTC<br>CAC GTA TCT CG   | amplify <i>FUM6</i> 5' flank<br>sequence (Fum6-mCherry) |
| FUM6_RF(GEN)         | <u>ATTCCACACAACATACGAGCC</u> GTT GGG CTC TTC GGG<br>TGC ATT                 | amplify <i>FUM6</i> 5' flank<br>sequence (Fum6-mCherry) |
| FUM8_LR<br>(mcherry) | <u>CT CCT CGC CCT TGC TCA CCA TAC</u> ATG TCC CTC GCG<br>ATA AAA TCT        | amplify <i>FUM8</i> 5' flank<br>sequence (Fum8-mCherry) |
| FUM8_RF(GEN)         | <u>ATTCCACACAACATACGAGCC</u> ATG TAA CTA GGC AGA<br>GTA GTA GTA TTG G       | amplify <i>FUM8</i> 5' flank<br>sequence (Fum8-mCherry) |
| mCherry-F            | ATGGTGAGCAAGGGCGAGGAG                                                       | amplify mCherry fragment                                |
| mCherry-R            | <u>TGG CGT TAC CCA ACT TAA TCG</u> CTA CTT GTA CAG CTC<br>GTC CAT GCC       | amplify mCherry fragment                                |
| Vam7_mcherry-F       | <u>aggaacaagaagctgggtacc</u> AGC TGA CAG CCT GTG GAA TAA                    | construction of pKNT-Vam7-<br>mCherry                   |
| Vam7_mcherry-<br>R   | <u>gcccttgctcaccataagctt</u> CAT TTT CTT GAT CCG GTT GTT CGC                | construction of pKNT-Vam7-<br>mCherry                   |
| Rab5-Pro-F           | <u>aggaacaagaagctgggtacc</u> TCATTGTAGTTGGCGACGTGTC                         | amplify <i>FvRAB5</i> promoter<br>sequence              |
| Rab5-Pro-R           | <u>CTC CTC GCC CTT GCT CAC CAT</u> CGT AGT GAG AGA TGG<br>GAA TGT AAT TTC G | amplify <i>FvRAB5</i> promoter<br>sequence              |
| Rab5-ORF-F           | <u>GGC ATG GAC GAG CTG TAC AAG</u> ATG GCC TCT CGA<br>CAA CCT CCA           | amplify <i>FvRAB5</i> sequence                          |
| Rab5-ter-R           | <u>tcagtaacgttaagtggatcc</u> AGA CCT CGG ACC AGA GCC TAA A                  | amplify <i>FvRAB5</i> sequence                          |
| Rab7-Pro-F1          | <u>aggaacaagaagctgggtacc</u> AAT ACA GTC AAC GGC TGG AC                     | amplify <i>FvRAB7</i> promoter<br>sequence              |
| Rab7-Pro-R1          | <u>CTC CTC GCC CTT GCT CAC CAT</u> CGT GTT GAA ATA TTG<br>TTT CTG GAC GAG   | amplify <i>FvRAB7</i> promoter<br>sequence              |
| Rab7-ORF-F1          | <u>GGC ATG GAC GAG CTG TAC AAG</u> ATG TCT TCA CGA<br>AAG AAG GTC CTT       | amplify <i>FvRAB7</i> sequence                          |

|             |                                                                          |                                          |
|-------------|--------------------------------------------------------------------------|------------------------------------------|
| Rab7-Ter-R1 | <u>tcagtaacgttaagtggatcc</u> GGT GGA TGT AAT AAG GGA GTG TAG             | amplify <i>FvRAB7</i> sequence           |
| Rab11-Pro-F | <u>agggaaacaaaagctgggtacc</u> AGG TGT AGG TGT AGG TAG GTA GGT            | amplify <i>FvRAB11</i> promoter sequence |
| Rab11-Pro-R | <u>CTC CTC GCC CTT GCT CAC CAT</u> CGT GGC TAC GGT GGT GTT GCT TCA       | amplify <i>FvRAB11</i> promoter sequence |
| Rab11-ORF-F | <u>GGC ATG GAC GAG CTG TAC AAG</u> ATG GCC AAC GAC GAA TAT GAT           | amplify <i>FvRAB11</i> sequence          |
| Rab11-ter-R | <u>tcagtaacgttaagtggatcc</u> GAT AGT AGA GCA ACA AGA CCA CC              | amplify <i>FvRAB11</i> sequence          |
| Vam7_LF/F2  | AGC TGA CAG CCT GTG GAA TAA                                              | validation of <i>FvVAM7</i> deletion     |
| Vam7_LF/F1  | CGG TTT GGG TGT TGT GTA TGA T                                            | amplify <i>FvVAM7</i> 5' flank sequence  |
| Vam7_LF/R1  | <u>G GCG TTA CCC AAC TTA ATC G</u> GTT GAT TGA AGC TTG GTT GTG GT        | amplify <i>FvVAM7</i> 5' flank sequence  |
| Vam7_RF/F1  | <u>T TCC ACA CAA CAT ACG AGC C</u> CAG CTA CCT CTC CTA CTA CTG GTA       | amplify <i>FvVAM7</i> 3' flank sequence  |
| Vam7_RF/R1  | CAT TAT TCA CTG CGT GGC TCC                                              | amplify <i>FvVAM7</i> 3' flank sequence  |
| Vam7_IN/F   | TCA CTC TTC GAC TAC CTC TGC                                              | validation of <i>FvVAM7</i> deletion     |
| Vam7_IN/R   | TCG TCG AAT AAC TGC AGT GAG C                                            | validation of <i>FvVAM7</i> deletion     |
| Vam7_RF/R2  | AGG AGT GGC TGT CCG TTC ATC                                              | validation of <i>FvVAM7</i> deletion     |
| Rab7_LF/F2  | GTA GAG GCA GTA TCG GCA TCA TT                                           | validation of <i>FvRAB7</i> deletion     |
| Rab7_LF/F1  | AGA TAC GAC GGG TAC GTA GAA GT                                           | amplify <i>FvRAB7</i> 5' flank sequence  |
| Rab7_LF/R1  | <u>G GCG TTA CCC AAC TTA ATC G</u> GTT GAA ATA TTG TTT CTG GAC GAG AAG C | amplify <i>FvRAB7</i> 5' flank sequence  |
| Rab7_RF/F1  | <u>T TCC ACA CAA CAT ACG AGC C</u> AGG ATG ACA TGG GCA GAT GCT           | amplify <i>FvRAB7</i> 3' flank sequence  |
| Rab7_IN/F   | AAG AAG GTC CTT CTC AAG GTG CG                                           | validation of <i>FvRAB7</i> deletion     |
| Rab7_IN/R   | GCT TTG TCA AGG TGT CAG AGC                                              | validation of <i>FvRAB7</i> deletion     |
| Rab7_RF/R1  | GAT ACA GTT GCG CTG TGT GAA AG                                           | amplify <i>FvRAB7</i> 3' flank sequence  |
| Rab7_RF/R2  | CCG TAC TCG AGG TTG GTG TAG                                              | validation of <i>FvRAB7</i> deletion     |

|                    |                                                   |                                                       |
|--------------------|---------------------------------------------------|-------------------------------------------------------|
| GEN/F              | CGA TTA AGT TGG GTA ACG CCA G                     | amplify GE fragment                                   |
| GE/R               | ATC ACG GGT AGC CAA CGC TA                        | amplify GE fragment                                   |
| EN/F               | TCG ACC ACC AAG CGA AAC AT                        | amplify EN fragment                                   |
| GEN/R              | GGC TCG TAT GTT GTG TGG AAT T                     | amplify EN fragment                                   |
| Vam7-qpcr-F        | ATT GGG CAA CGA GGG AGT GCT A                     | qPCR analysis                                         |
| Vam7-qpcr-R        | CCT CTT CAT GGA TTC GCT CTC CCA                   | qPCR analysis                                         |
| Rab7-qpcr-F        | GGA CCC TCC CAA CTT CCC ATT T                     | qPCR analysis                                         |
| Rab7-qpcr-R        | TTG GAC TGG CAG AAT GTC ATG GC                    | qPCR analysis                                         |
| $\alpha 1$ -qpcr-F | ACTACGGCAAGAAGAGCAAG                              | qPCR analysis                                         |
| $\alpha 1$ -qpcr-R | GTGGTGTGTGTGGTAAGGATAG                            | qPCR analysis                                         |
| $\alpha 2$ -qpcr-F | CTTCAGGGTTTCCTGATCTTCC                            | qPCR analysis                                         |
| $\alpha 2$ -qpcr-R | GCTTAGACTTCTTGCCGTACTC                            | qPCR analysis                                         |
| $\beta 1$ -qpcr-F  | TATGAAGGAGGTCGAGGATCAG                            | qPCR analysis                                         |
| $\beta 1$ -qpcr-R  | CAAAGGGCTGTCTGGATGTT                              | qPCR analysis                                         |
| $\beta 2$ -qpcr-F  | GCAGGGCTTCCAACATCTTA                              | qPCR analysis                                         |
| $\beta 2$ -qpcr-R  | TATCGACCGTTGCGGAAATC                              | qPCR analysis                                         |
| $\beta 1$ nLuc F   | AAGCTCGAGTAG <u>GTCTGAC</u> ATGCGTGAGATTGTAAGTACC | construction of pFNLuc- <i>Fv<math>\beta_1</math></i> |
| $\beta 1$ nLuc R   | CGTACGAGATCTG <u>GTCTGAC</u> CTCCTCGCCCTCAGGGAGCT | construction of pFNLuc- <i>Fv<math>\beta_1</math></i> |
| $\beta 2$ nLuc F   | <u>AAGCTCGAGTAGTCTGAC</u> ATGCGTGAGATTGTGAGACT    | construction of pFNLuc- <i>Fv<math>\beta_2</math></i> |
| $\beta 2$ nLuc R   | <u>CGTACGAGATCTGGTCTGAC</u> GCCCTCATACTCCTCAGGCT  | construction of pFNLuc- <i>Fv<math>\beta_2</math></i> |
| $\alpha 1$ cLuc F  | <u>CGTCCCGGGGCGGTAC</u> CGTGAGGTCATTAGCATCAA      | construction of pFCLuc- <i>Fva_1</i>                  |
| $\alpha 1$ cLuc R  | <u>TTGGATCCCCGGGTAC</u> CTTAGTACTCAGCCTCGAGCT     | construction of pFCLuc- <i>Fva_1</i>                  |
| $\alpha 2$ cLuc F  | CGTCCCGGGGCGGTACCAAGGGCGAGGTATGTCTAC              | construction of pFCLuc- <i>Fva_2</i>                  |

|                   |                                                        |                                                   |
|-------------------|--------------------------------------------------------|---------------------------------------------------|
|                   |                                                        |                                                   |
| $\alpha 2$ cLuc R | TTGGATCCCCG <u>GGTACC</u> CTAGTACTCGAGCTCCTCTT         | construction of pFCLuc- <i>Fva</i> <sub>2</sub>   |
| $\alpha 1$ LF/F1  | CTTACGAACGCAATGGAAT                                    | amplify <i>Fva</i> <sub>1</sub> 5' flank sequence |
| $\alpha 1$ LF/R1  | <u>GGCGTTACCCAACTTAATCGG</u> ATTGGACCTTCTATGGATT       | amplify <i>Fva</i> <sub>1</sub> 5' flank sequence |
| $\alpha 1$ RF/F1  | <u>TTCCACACAACATACGAGCC</u> CTAATGAAGTCCGCGAATG<br>T   | amplify <i>Fva</i> <sub>1</sub> 3' flank sequence |
| $\alpha 1$ RF/R1  | GCCGTATGTATCGTGGAAG                                    | amplify <i>Fva</i> <sub>1</sub> 3' flank sequence |
| $\alpha 1$ IN/F   | TCAAGGTTTCCTCGTGTC                                     | validation of <i>Fva</i> <sub>1</sub> deletion    |
| $\alpha 1$ IN/R   | TCGCCGTTAGGCACATTCT                                    | validation of <i>Fva</i> <sub>1</sub> deletion    |
| $\alpha 1$ LF/F2  | TGCTATGGCACAATCCGTC                                    | validation of <i>Fva</i> <sub>1</sub> deletion    |
| $\alpha 1$ RF/R2  | GAACTGCTTTGCCTACGGT                                    | validation of <i>Fva</i> <sub>1</sub> deletion    |
| $\alpha 2$ LF/F1  | CTGGAGTCAAGGAGGATGG                                    | amplify <i>Fva</i> <sub>2</sub> 5' flank sequence |
| $\alpha 2$ LF/R1  | <u>GGCGTTACCCAACTTAATCGG</u> AGGTGGTGATGGTTTTCG        | amplify <i>Fva</i> <sub>2</sub> 5' flank sequence |
| $\alpha 2$ RF/F1  | <u>TTCCACACAACATACGAGCC</u> ATAGGCATTGAATACATTA<br>GCC | amplify <i>Fva</i> <sub>2</sub> 3' flank sequence |
| $\alpha 2$ RF/R1  | GCCGCAGAACTCAATGGTA                                    | amplify <i>Fva</i> <sub>2</sub> 3' flank sequence |
| $\alpha 2$ IN/F   | CTCAACGCTAACCGCACAA                                    | validation of <i>Fva</i> <sub>2</sub> deletion    |
| $\alpha 2$ IN/R   | AAGCCTATGGGGAGTCAGT                                    | validation of <i>Fva</i> <sub>2</sub> deletion    |
| $\alpha 2$ LF/F2  | CGCCATCACAAGAACAAAG                                    | validation of <i>Fva</i> <sub>2</sub> deletion    |
| $\alpha 2$ RF/R2  | CGCCAAAGACAACAAATCG                                    | validation of <i>Fva</i> <sub>2</sub> deletion    |
| $\beta 1$ LF/F1   | AGGGGTTGTGCCTCTTTTC                                    | amplify <i>Fvβ</i> <sub>1</sub> 5' flank sequence |
| $\beta 1$ LF/R1   | <u>GGCGTTACCCAACTTAATCGG</u> AGACCAAAGGGCGATGTT        | amplify <i>Fvβ</i> <sub>1</sub> 5' flank sequence |
| $\beta 1$ RF/F1   | <u>TTCCACACAACATACGAGCC</u> CTGACTTACTCGAACTGGTC       | amplify <i>Fvβ</i> <sub>1</sub> 3' flank sequence |
| $\beta 1$ RF/R1   | AGGGAAAATGAGTAGGAAGAC                                  | amplify <i>Fvβ</i> <sub>1</sub> 3' flank sequence |
| $\beta 1$ IN/F    | GTCACCACCTGTCTCCGTT                                    | validation of <i>Fvβ</i> <sub>1</sub> deletion    |
| $\beta 1$ IN/R    | CTCCATCTCGTCCATACCC                                    | validation of <i>Fvβ</i> <sub>1</sub> deletion    |
| $\beta 1$ LF/F2   | GGTGGTTTATGGGTGTTGA                                    | validation of <i>Fvβ</i> <sub>1</sub> deletion    |
| $\beta 1$ RF/R2   | ATTCACGGAAAGCGTCTCG                                    | validation of <i>Fvβ</i> <sub>1</sub> deletion    |

|                 |                                                      |                                                         |
|-----------------|------------------------------------------------------|---------------------------------------------------------|
| $\beta 2$ LF/F1 | ACCTCGCTCTGAGAATACC                                  | amplify <i>Fv<math>\beta 2</math></i> 5' flank sequence |
| $\beta 2$ LF/R1 | <u>GGCGTTACCCAACTTAATCGGGCTTGATTGAGGCTTTGC</u>       | amplify <i>Fv<math>\beta 2</math></i> 5' flank sequence |
| $\beta 2$ RF/F1 | <u>TTCCACACAACATACGAGCCTCTCTTTAATCATGCTTGAC</u><br>G | amplify <i>Fv<math>\beta 2</math></i> 3' flank sequence |
| $\beta 2$ RF/R1 | GAAACTACGACCGCAGCAT                                  | amplify <i>Fv<math>\beta 2</math></i> 3' flank sequence |
| $\beta 2$ IN/F  | CATCTTCAGGGTTTCCAGC                                  | validation of <i>Fv<math>\beta 2</math></i> deletion    |
| $\beta 2$ IN/R  | CTTGAGCATCTGGTCTTCG                                  | validation of <i>Fv<math>\beta 2</math></i> deletion    |
| $\beta 2$ LF/F2 | TCACGGTGCCTGAAAAGTC                                  | validation of <i>Fv<math>\beta 2</math></i> deletion    |
| $\beta 2$ RF/R2 | ACCTCCGTATCAGCCAAAC                                  | validation of <i>Fv<math>\beta 2</math></i> deletion    |

The sequence complementary to a DNA fragment or a linearized vector was underlined. The restriction site was gray shading.

**Table S2. Relative expression level of *PKS* genes in wild-type,  $\Delta Fvrab7$  and  $\Delta Fvvam7$ .**

| Relative expression level |    |                  |                  |
|---------------------------|----|------------------|------------------|
| Gene                      | WT | $\Delta Fvrab7$  | $\Delta Fvvam7$  |
| <i>PKS1</i>               | 1  | 5.64 $\pm$ 0.77  | 3.45 $\pm$ 0.63  |
| <i>PKS2</i>               | 1  | 0.32 $\pm$ 0.07  | 0.25 $\pm$ 0.11  |
| <i>PKS3</i>               | 1  | 1.36 $\pm$ 0.17  | 420.7 $\pm$ 32.8 |
| <i>PKS4</i>               | 1  | 0.13 $\pm$ 0.002 | 0.57 $\pm$ 0.07  |
| <i>PKS5</i>               | 1  | 0.30 $\pm$ 0.11  | 0.39 $\pm$ 0.19  |
| <i>PKS6</i>               | 1  | 1.91 $\pm$ 0.23  | 1.82 $\pm$ 0.17  |
| <i>PKS7</i>               | 1  | 0.08 $\pm$ 0.03  | 0.25 $\pm$ 0.08  |
| <i>PKS8</i>               | 1  | 0.17 $\pm$ 0.09  | 0.65 $\pm$ 0.19  |
| <i>PKS9</i>               | 1  | 3.32 $\pm$ 0.49  | 1.91 $\pm$ 0.28  |
| <i>PKS10</i>              | 1  | 1.90 $\pm$ 0.33  | 0.93 $\pm$ 0.27  |
| <i>PKS11</i>              | 1  | 0.12 $\pm$ 0.03  | 0.17 $\pm$ 0.04  |
| <i>PKS12</i>              | ND | ND               | ND               |
| <i>PKS13</i>              | 1  | 0.44 $\pm$ 0.24  | 0.46 $\pm$ 0.05  |
| <i>PKS14</i>              | 1  | 1.40 $\pm$ 0.10  | 1.32 $\pm$ 0.14  |
| <i>PKS15</i>              | 1  | 2.10 $\pm$ 0.37  | 2.32 $\pm$ 0.41  |

Mycelia of each mutants were incubated in myro liquid medium for 5 days at 28°C. Each gene expression was normalized with  $\beta$ -tubulin expression level. Gene expressions were calculated using  $2^{-\Delta\Delta C_t}$ . Gene expression level of wild-type strain was standardized to 1.0. Three replicates were performed for each test. ND: not detected.
